# Supplementary material
Source: publisher figshare collection journal article supplement (https://rs.figshare.com/ndownloader/files/13764536)

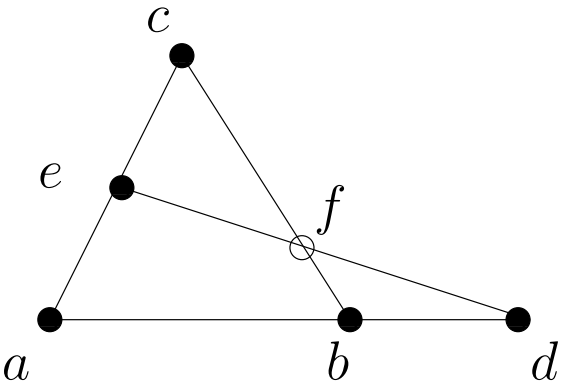

**IP**

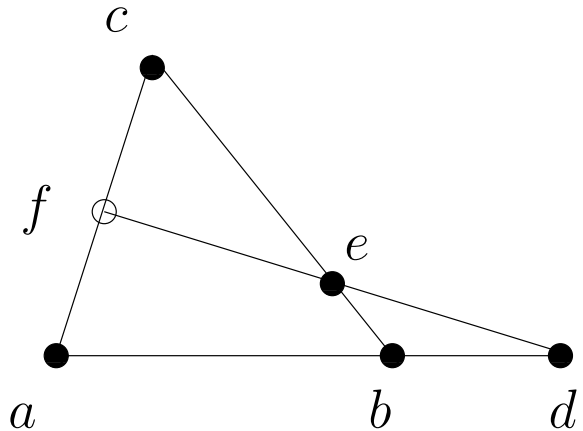

**OP**

Supplement: Supplementary file 1 [file 13764536]
